# Supplementary material for: Gut microbiome modulates tacrolimus pharmacokinetics through the transcriptional regulation of ABCB1
Source: PubMed Central journal article supplement (PMC10324113; doi:10.1186/s40168-023-01578-y), 2023-07-06
Supplement: 40168_2023_1578_MOESM2_ESM.pdf [file 40168_2023_1578_MOESM2_ESM.pdf]

# Gut microbiome modulates tacrolimus pharmacokinetics through the transcriptional regulation of ABCB1

Alexandra L. Degraeve<sup>1,2</sup>, Vincent Haufroid<sup>3,4</sup>, Axelle Lorient<sup>5</sup>, Laurent Gatto<sup>5</sup>, Vanessa Andries<sup>6,7,8</sup>, Lars Vereecke<sup>6,7,8</sup>, Laure Elens<sup>1,3,9</sup>, Laure B. Bindels<sup>2,9</sup>#

<sup>1</sup>Department of Integrated Pharmacometrics, Pharmacogenomics and Pharmacokinetics, Louvain Drug Research Institute, Université catholique de Louvain, Brussels, Belgium.

<sup>2</sup>Metabolism and Nutrition Research Group, Louvain Drug Research Institute, Université catholique de Louvain, Brussels, Belgium.

<sup>3</sup>Louvain centre for Toxicology and Applied Pharmacology, Institut de Recherche Expérimentale et Clinique, Université catholique de Louvain, Brussels, Belgium.

<sup>4</sup>Department of Clinical Chemistry, Cliniques Universitaires Saint-Luc, Brussels, Belgium.

<sup>5</sup>Computational Biology and Bioinformatics Unit (CBIO), de Duve Institute, Université catholique de Louvain, Brussels, Belgium.

<sup>6</sup>Department of Internal Medicine and Pediatrics, Ghent University, Ghent, Belgium.

<sup>7</sup>VIB-UGent Center for Inflammation Research, Ghent, Belgium.

<sup>8</sup>Ghent Gut Inflammation Group (GGIG), Ghent, Belgium.

<sup>9</sup>Contributed equally to this work

#**Correspondence:** Laure B. Bindels, laure.bindels@uclouvain.be. Avenue E. Mounier, 73, B1.73.11, Brussels, Belgium. ORCID: LBB 0000-0003-3747-3234.

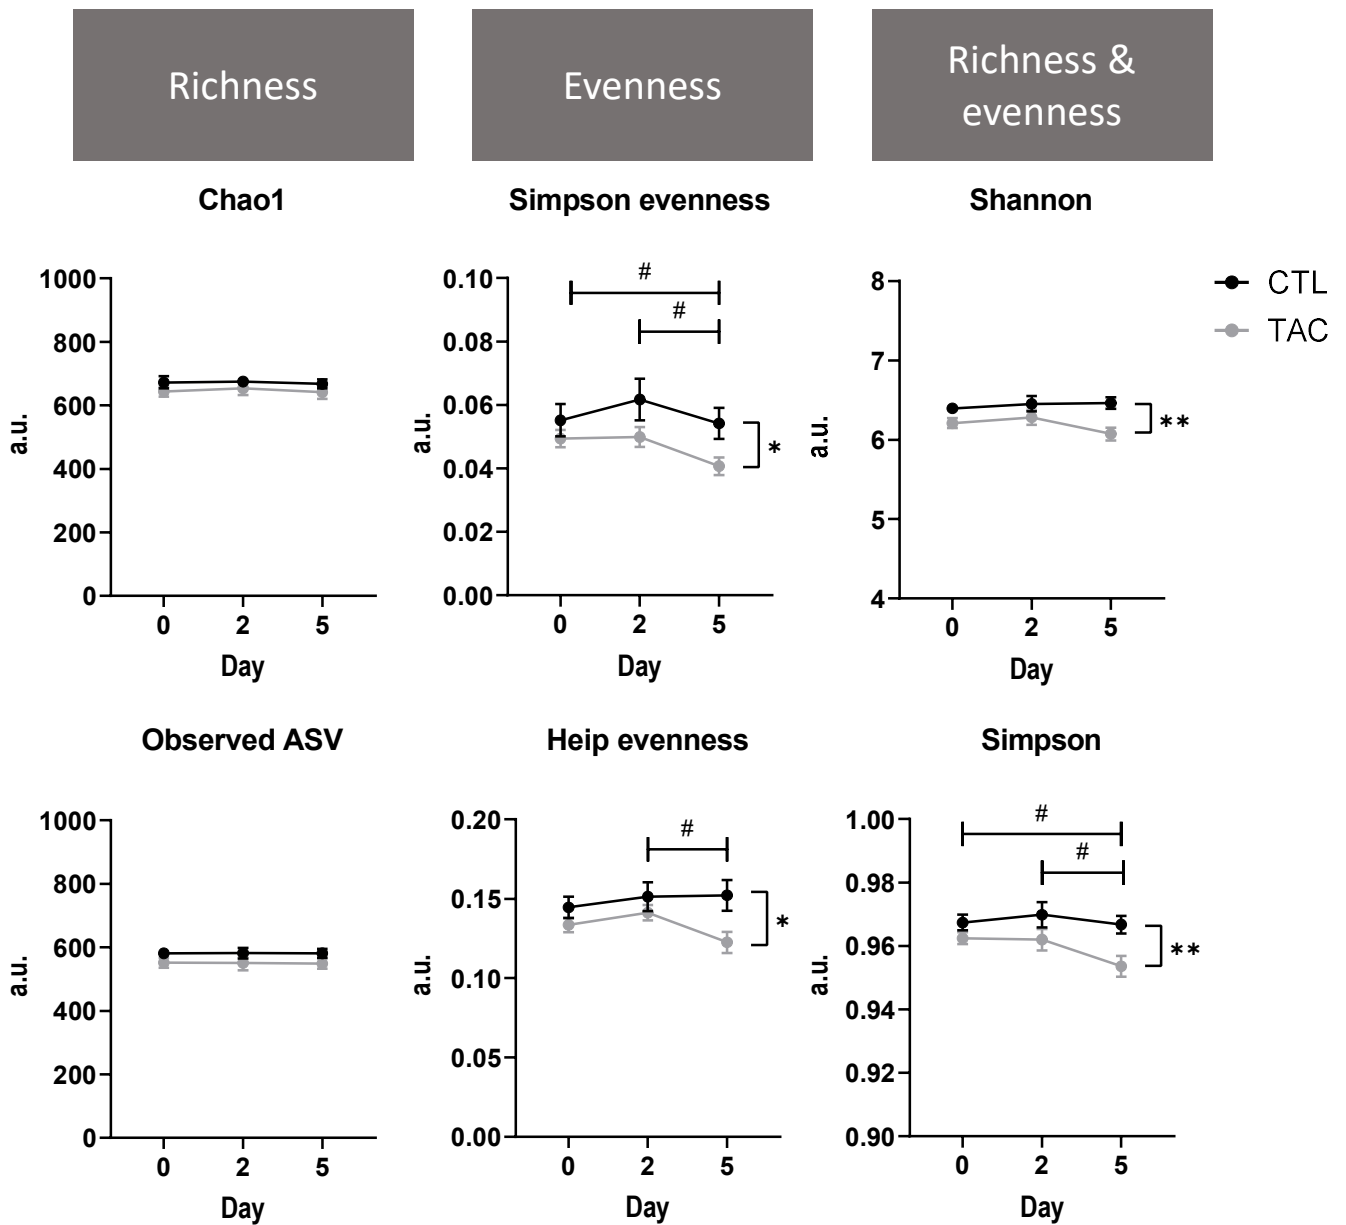

**Figure S1. Tacrolimus (TAC) treatment affects the evenness but not the richness of the faecal microbiota.** Evolution of  $\alpha$ -diversity metrics (in arbitrary units, a.u.) of control (CTL) and TAC-treated mice along the treatment ( $n = 7-8/\text{group}$ ). \*\* $p < 0.01$ , \* $p < 0.05$  (Mann-Whitney test, CTL vs TAC). # $p < 0.05$  (Friedman test with Dunn *post hoc* test, TAC repeated-measures).

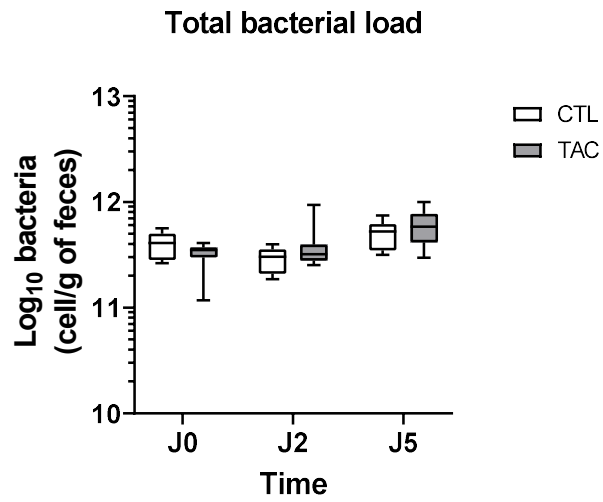

**Figure S2. Total bacterial load is unaffected by tacrolimus (TAC) treatment.** Evolution of the total bacterial load in faecal samples of control (CTL) and TAC-treated mice along the treatment (n = 7-8/group).

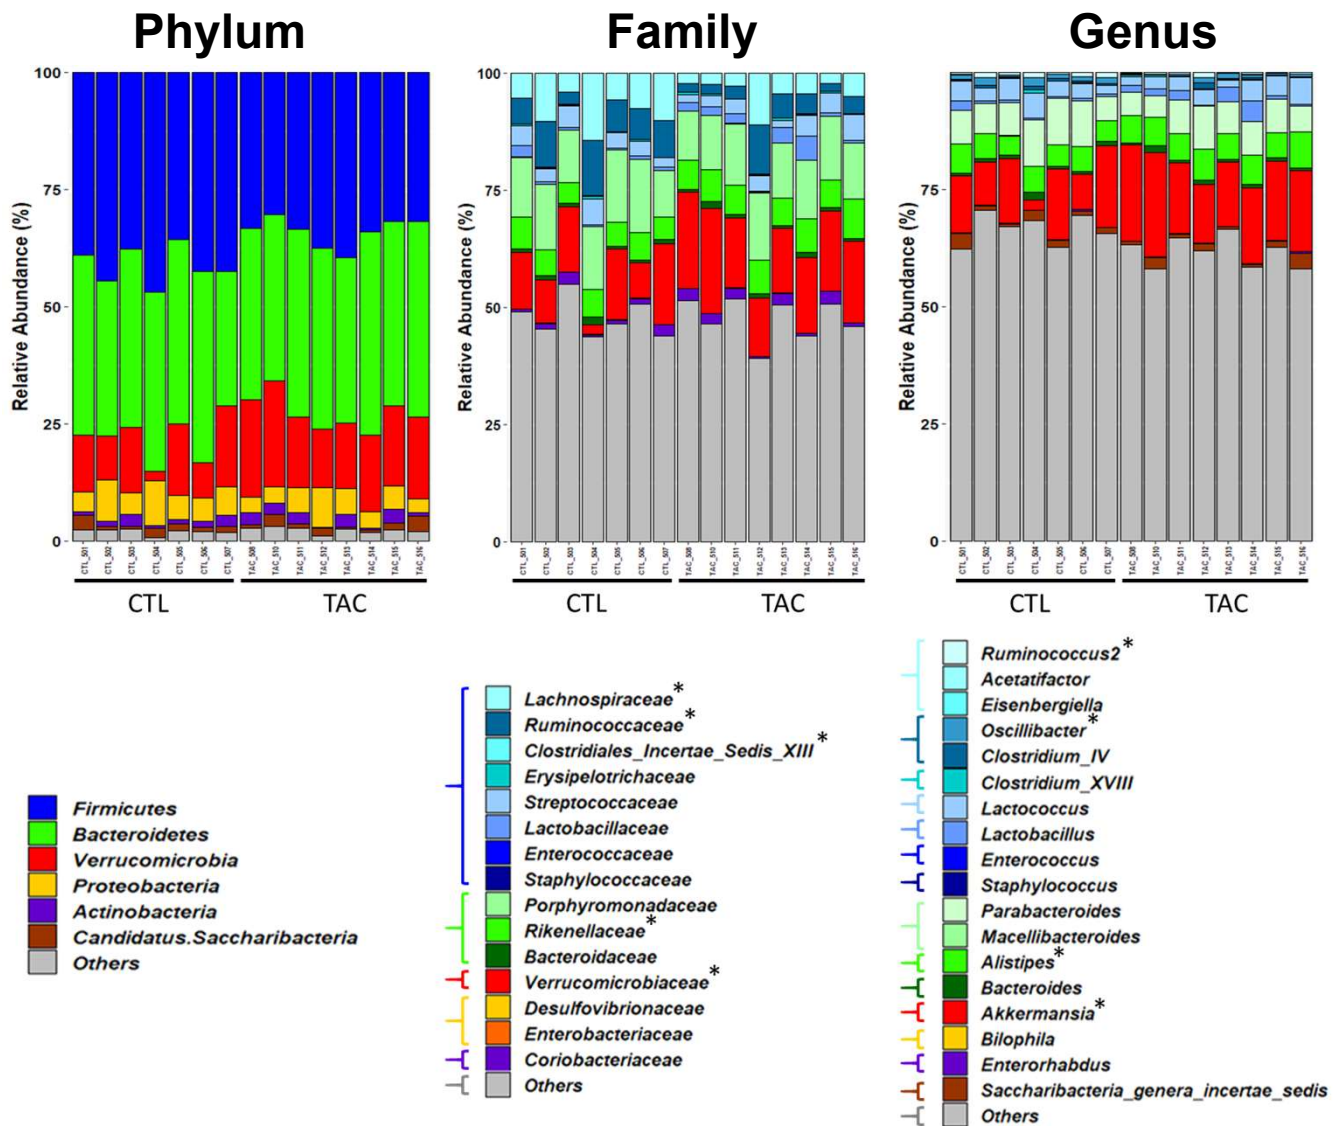

**Figure S3. Faecal microbiota composition after tacrolimus (TAC) treatment.** Stacked barplots showing the relative abundance of phyla, families, and genera of mice after 5 days of oral gavage with TAC or vehicle (CTL) (n = 7-8/group). \* indicated taxa significantly impacted by TAC.

**A**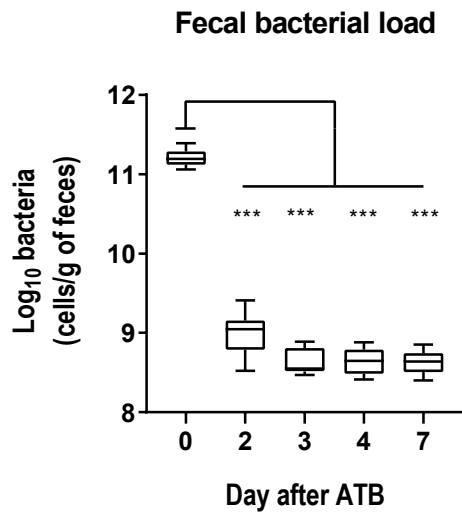**B**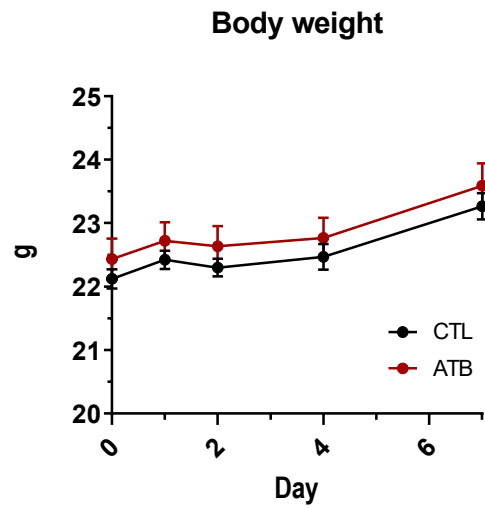**C**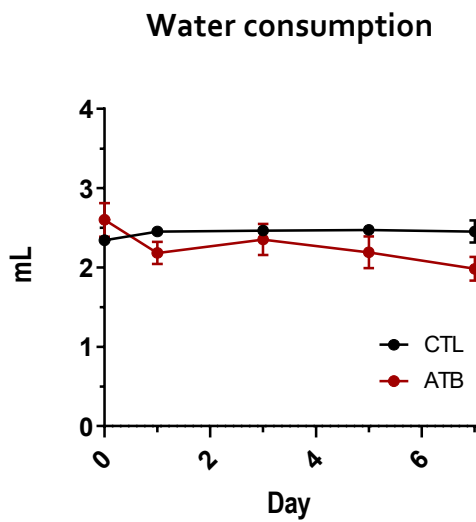**D**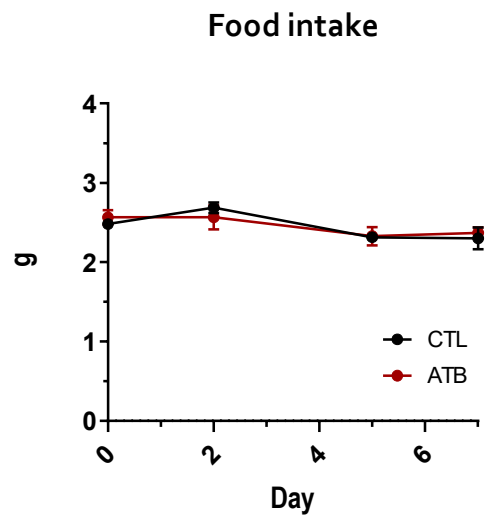

**Figure S4. Impact of antibiotic (ATB) treatment on mice monitoring parameters.** (A) Faecal bacterial load over ATB treatment. \*\*\* $p < 0.001$ . (B-D) The ATB cocktail does not affect the body weight (B), the water consumption (C), or the food intake (D) of the mice ( $n = 6/\text{group}$ ).

Proximal  
small intestine

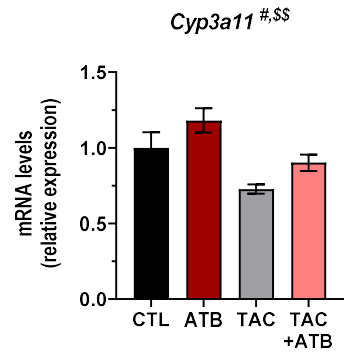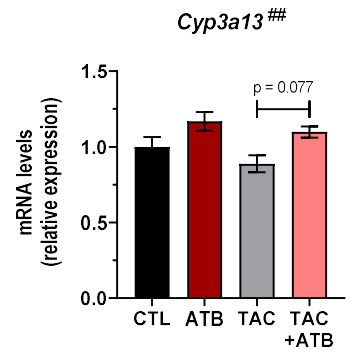

Median  
small intestine

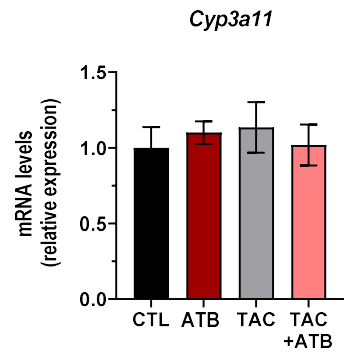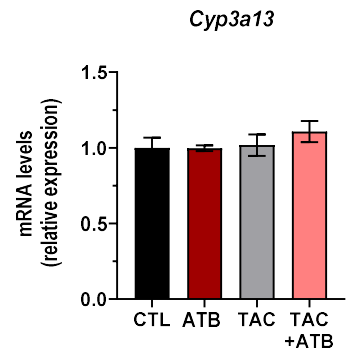

Distal  
small intestine

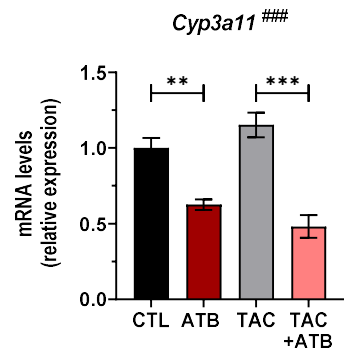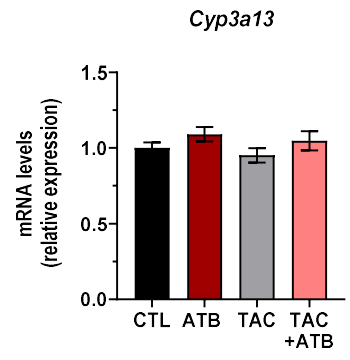

Colon

Not  
detected

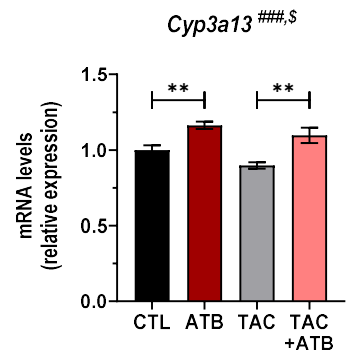

Liver

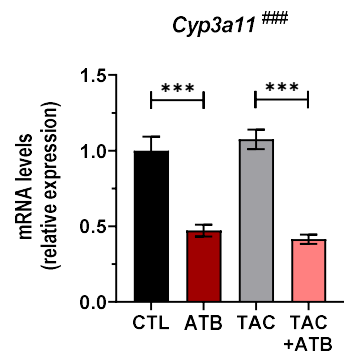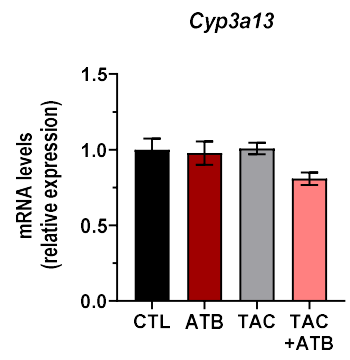

**Figure S5. Antibiotic (ATB) -mediated gut microbiota depletion impacts the mRNA expression of key tacrolimus (TAC) -processing genes.** Comparison of the mRNA expression of *Cyp3a11* and *Cyp3a13* in the proximal, median and distal small intestine, in the colon, and in the liver of control and ATB-treated mice, with or without TAC treatment (n = 7-8/group). #significant ATB effect; \$significant TAC effect; \*\*\*p < 0.001, \*\*p < 0.01 and \*p < 0.05.

**A**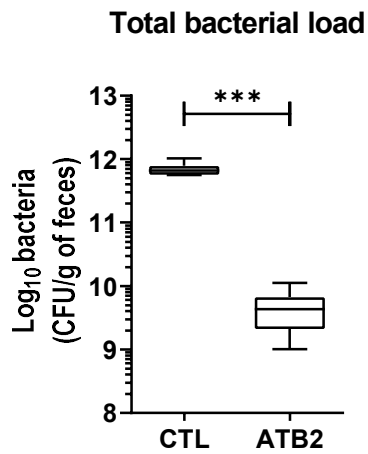**B**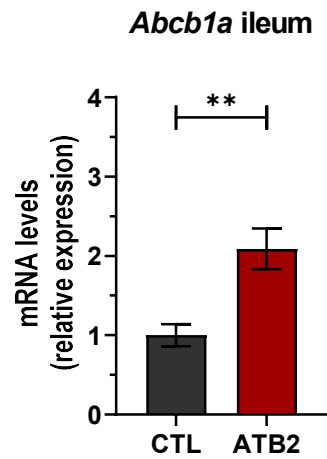

**Figure S6. Intestinal *Abcb1a* expression is induced by an alternative antibiotic cocktail (ATB2) used to deplete the gut microbiota.** (A) Efficient reduction of the total bacterial load by the ATB2 (neomycin 0.5g/L, ampicillin 1g/L) in BALB/c mice. (B) Comparison of the mRNA expression of *Abcb1a* in the ileum of control and ATB-treated mice (n = 7-8/group). \*\*\*p < 0.001 and \*\*p < 0.01.



Proximal  
small intestine

**A**

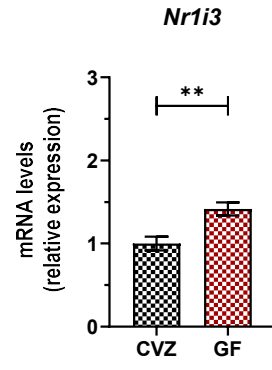

**B**

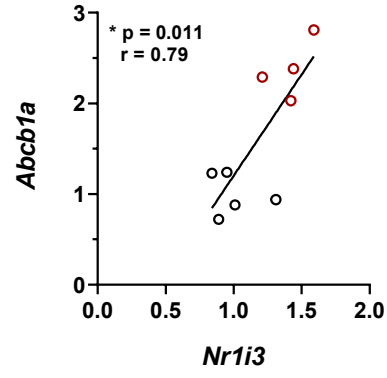

Median  
small intestine

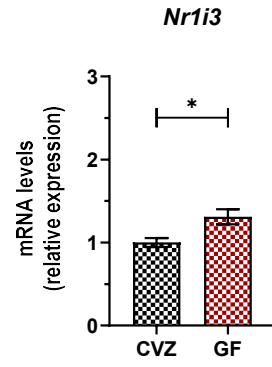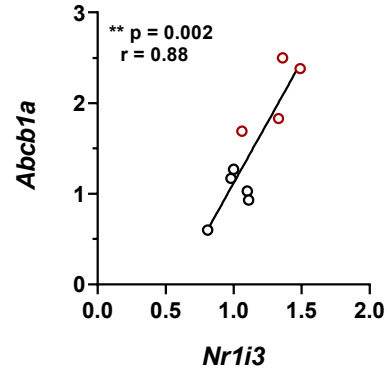

Distal  
small intestine

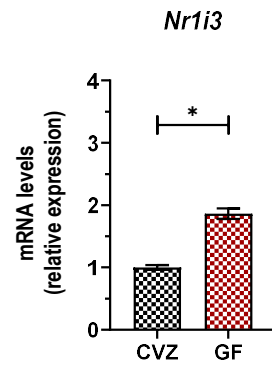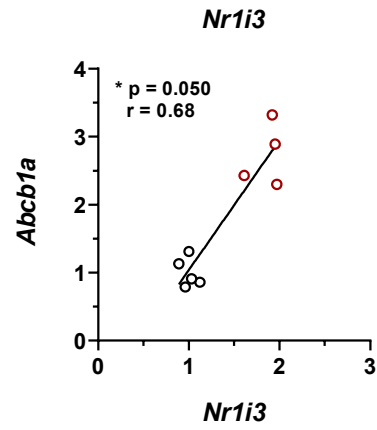

Colon

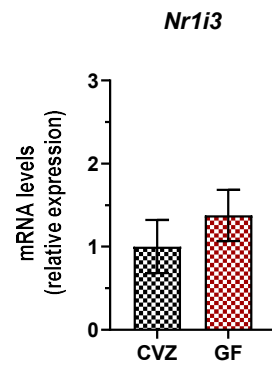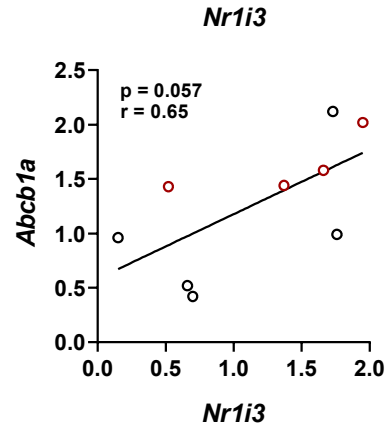

Liver

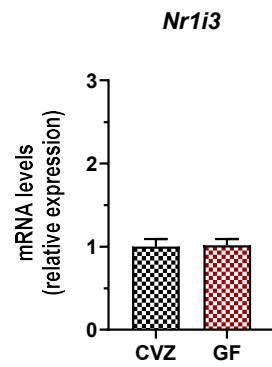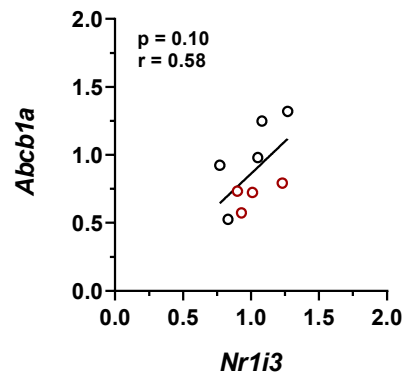

**Figure S7. mRNA expression of CAR correlates with *Abcb1a* levels in mouse intestine.** In mice, the transcription factor CAR is encoded by the *Nr1i3* gene. (A) Comparison of the mRNA expression of *Nr1i3* in the proximal, median and distal small intestine, in the colon, and in the liver of conventionalized (CVZ) and germ-free (GF) mice (n = 4-5/group). \*\*p < 0.01 and \*p < 0.05. (B) Spearman's correlation between *Nr1i3* and *Abcb1a* mRNA expression levels in the different tissues.

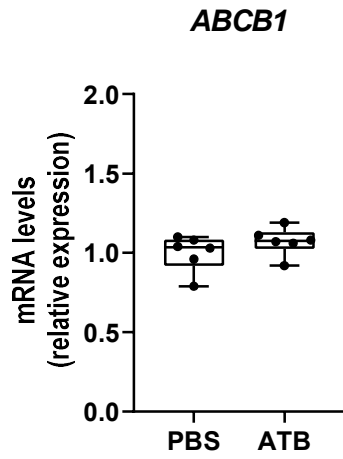

**Figure S8. Antibiotics (ATB) do not affect *ABCB1* expression *in vitro*.** Comparison of the mRNA expression of *ABCB1* in LS174T cells treated with ATB or vehicle (PBS) for 48 hours (n = 6/group, representative of two independent experiments).
